# Supplementary material for: Detection and High‐Throughput Microbial Analysis of Particulate Matter in Houses and Downwind Areas of Duck Farms
Source: Hindawi journal article supplement (doi:10.1155/2024/7774679), 2024-01-01
Supplement: f1 [file 7774679.f1.docx]

**Detection and high-throughput microbial analysis of particulate matter in houses and downwind areas of duck farms**

Zhengxiu Qu1, Hairong Wang1, Ning Li1, Zhiyun Guo1, Jing Li1, Xiaoyang Lv1, Yinling Cui2, Tongjie Chai1

1 College of Animal Science and Veterinary Medicine, Shandong Agricultural University, Key Laboratory of Animal Bioengineering and Animal Disease of Shandong Province, Sino-German Cooperative Research Centre for Zoonosis of Animal Origin Shandong Province, 61 Daizong Road, Tai’ an, 271000, Shandong Province, China

2 Shandong Provincial Hospital for Skin Disease & Shandong Provincial Institute of Dermatology and Venereology, Shandong First Medical University & Shandong Academy of Medical Sciences, Jinan, 250022, Shandong Province, Chian

Correspondence should be addressed to Hairong Wang; [wanghairongtaian@163.com](mailto:wanghairongtaian@163.com) and Tongjie Chai; chaitj117@163.com

**Table of contents**

Figure S1: Number of genes Venn Graph.

Figure S2:Relative abundance of PM samples at the domain level in duck houses（A） and downwind points（B）.

Figure S3: NMDS of samples in duck house（A） and downwind point（B）.

Figure S4: Overview of Resistance Genes.

Figure S5: The boxplot of bacterial diversity index of PM samples.

Figure S6: Comparative Veen diagram of bacteria OTUs in PM samples in duck house（A）and downwind point（B）.

Figure S7: The boxplot of fungi diversity index of PM samples.

Figure S8: Comparative Veen diagram of fungi OTUs in PM samples in duck house（A）and downwind point（B）.

Table S1: Sampling information of duck house environment in winter.

Table S2:Alpha diversity index statistics.


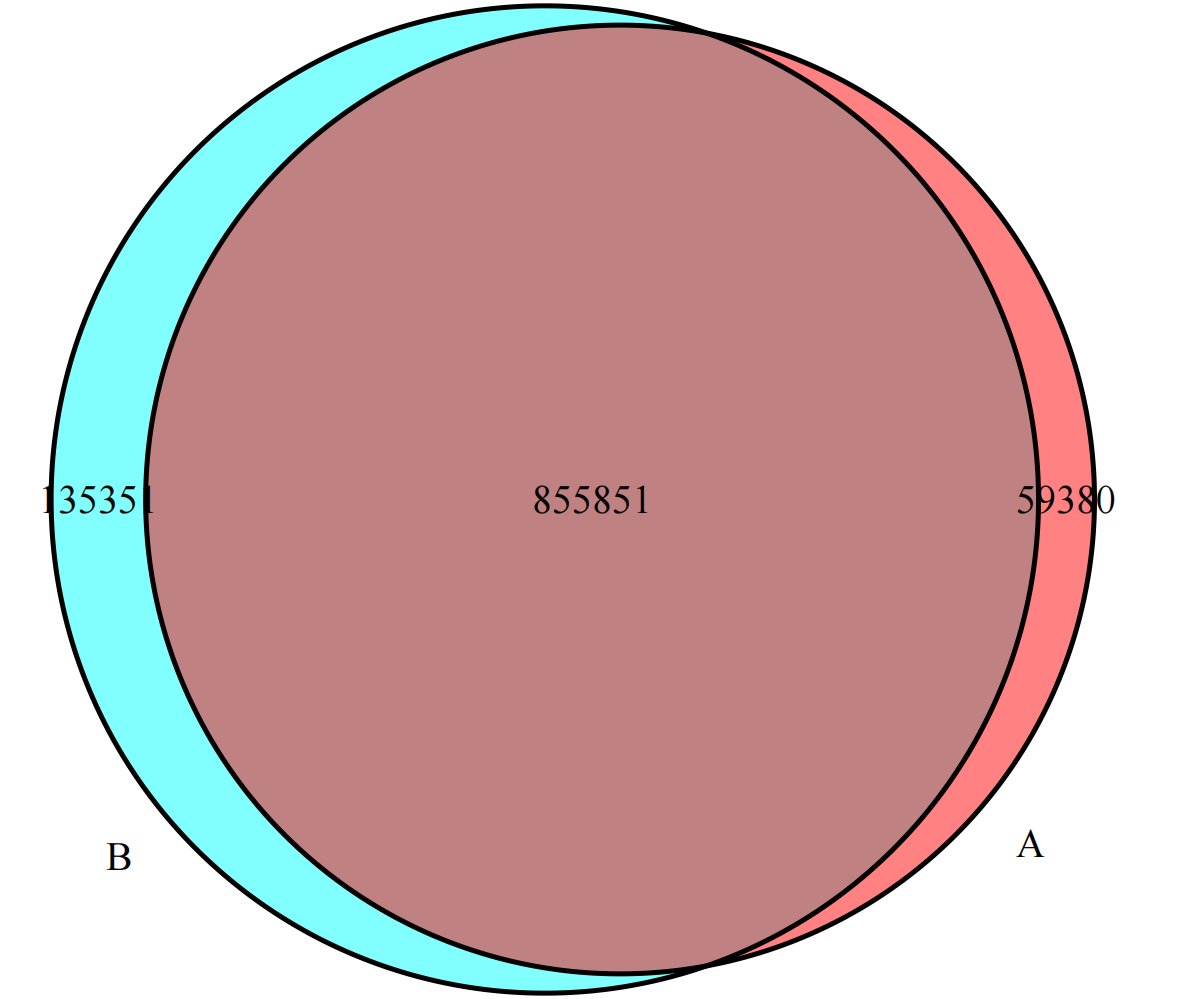


Figure S1:Number of genes Venn Graph. In the figure, each circle represents a sample; The number of circles and overlapping parts of circles represents the number of genes shared between samples; Numbers without overlapping parts represent the number of unique genes in the sample.

Figure S2:Relative abundance of PM samples at the domain level in duck houses（A） and downwind points（B）.


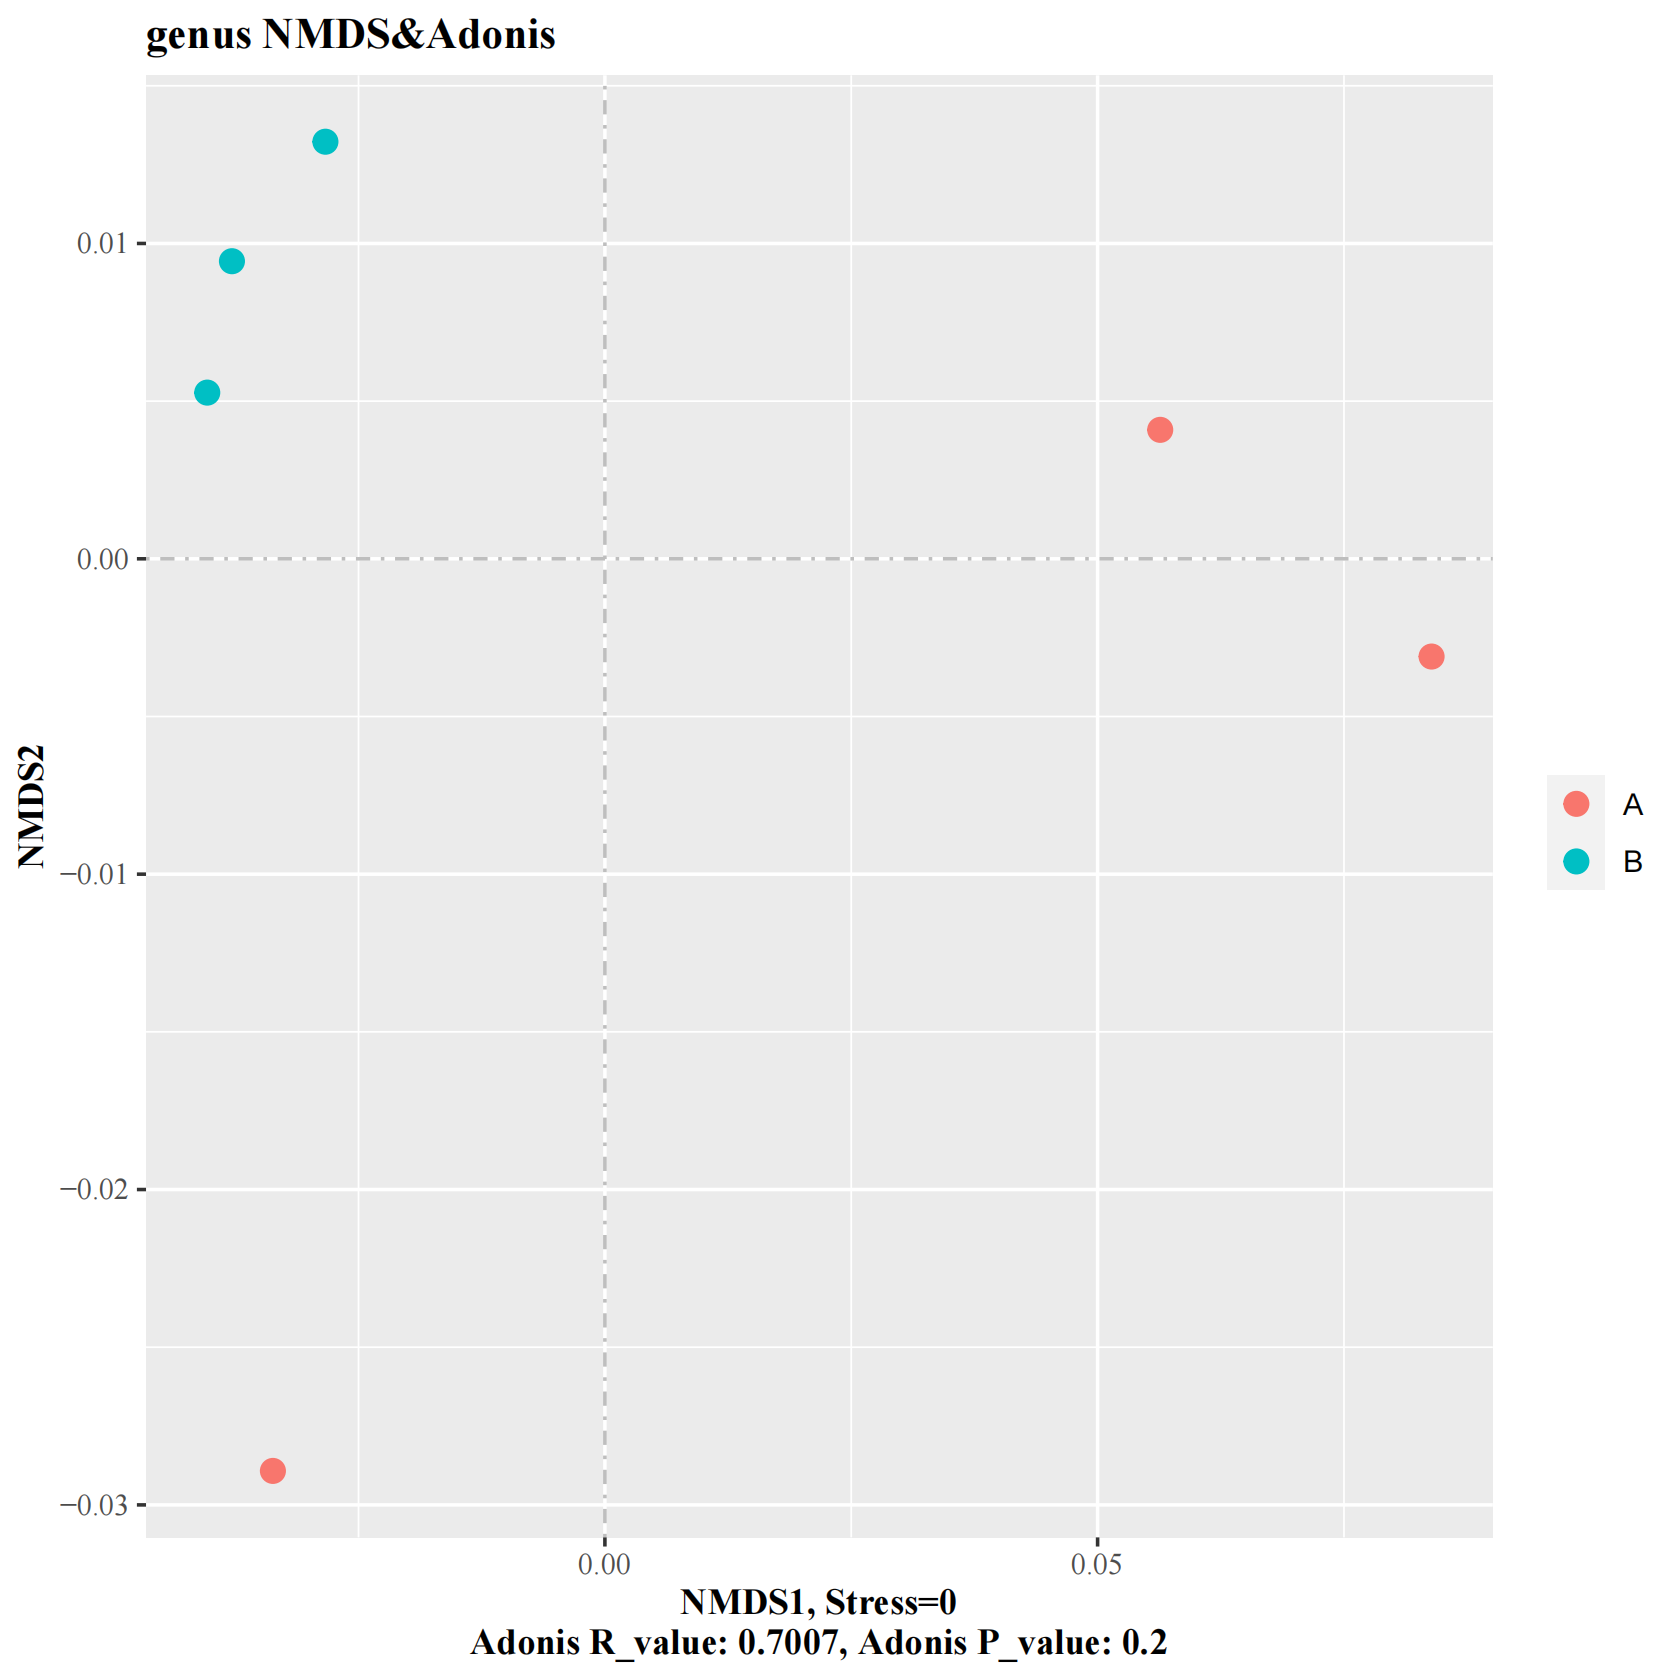


Figure S3: NMDS of PM samples in duck house（A） and downwind point（B）.The more similar the species composition of the samples, the closer together they are in the NMDS plot.


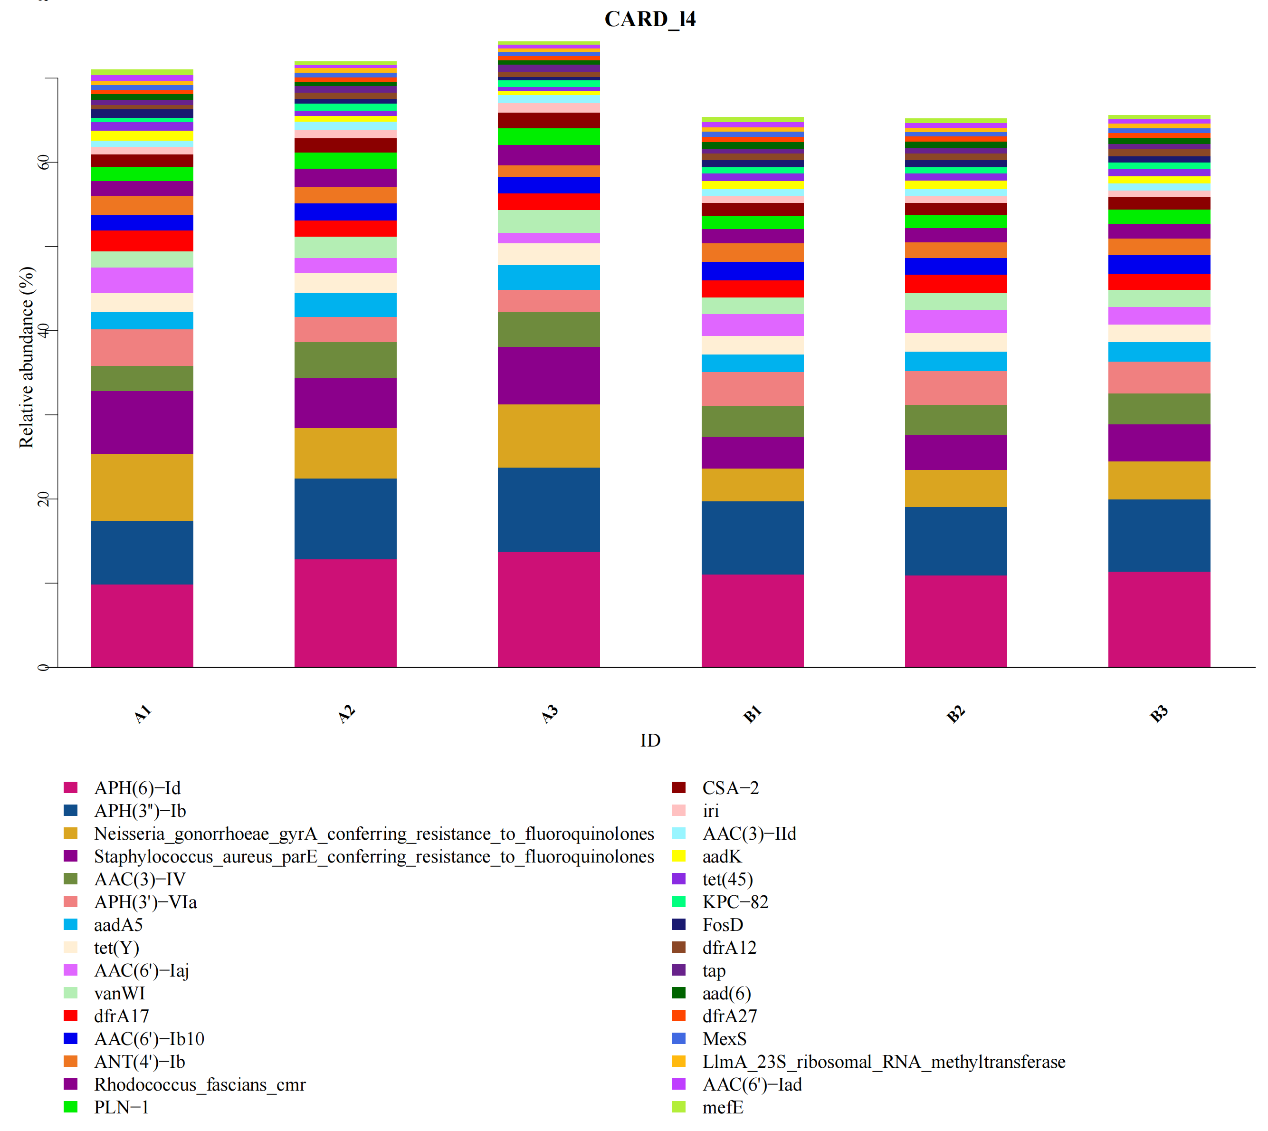


Figure S4: Overview of Resistance Genes.


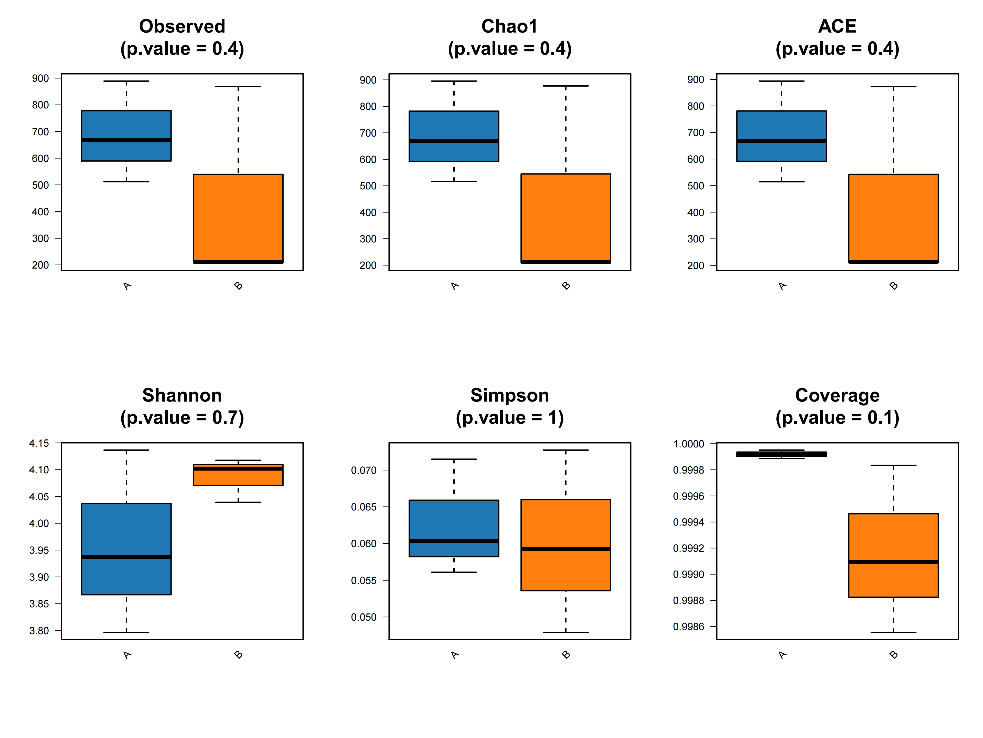


Figure S5: The boxplot of bacterial diversity index of PM samples. The figure shows six diversity indices for each group of samples, where the abscissa indicates different groups and the ordinate indicates the value of the community diversity index of that group of samples, and different groups are distinguished by different colors.


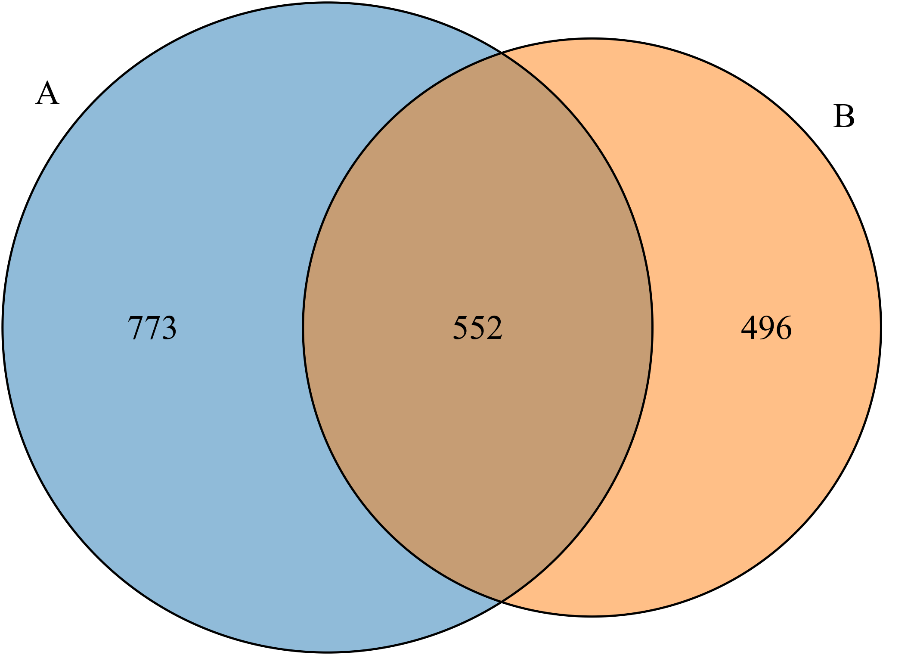


Figure S6: Comparative Veen diagram of bacteria OTUs in PM samples in duck house（A）and downwind point（B）. In the figure, each circle represents a sample; The number of circles and overlapping parts of circles represents the number of genes shared between samples; Numbers without overlapping parts represent the number of unique genes in the sample.


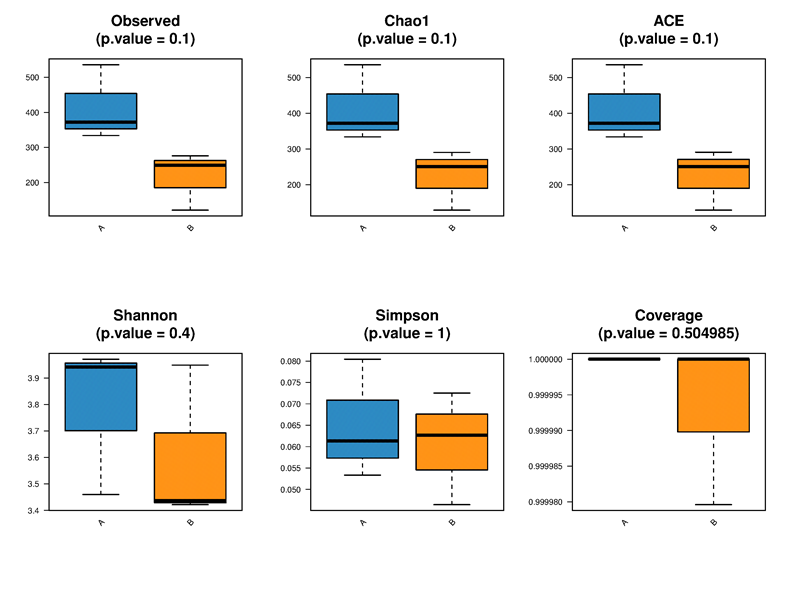


Figure S7: The boxplot of fungi diversity index of PM samples. The figure shows six diversity indices for each group of samples, where the abscissa indicates different groups and the ordinate indicates the value of the community diversity index of that group of samples, and different groups are distinguished by different colors.


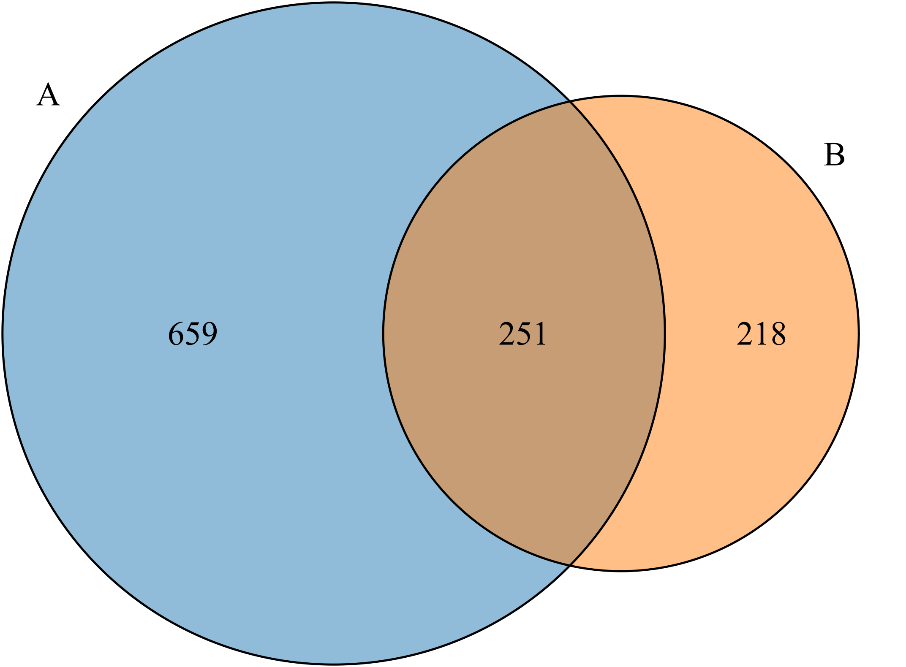


Figure S8: Comparative Veen diagram of fungi OTUs in PM samples in duck house（A）and downwind point（B）.In the figure, each circle represents a sample; The number of circles and overlapping parts of circles represents the number of genes shared between samples; Numbers without overlapping parts represent the number of unique genes in the sample.

Table S1: Sampling information of duck house environment in winter.

| Endotoxin concentration  （×103 EU/m3） | Temperature  （℃） | Humidity  （%） | CO2 concentration  （ppm） | NH3 concentration  （ppm） |
| --- | --- | --- | --- | --- |
| 25.26±1.04 | 18.80±1.04 | 53.30±3.06 | 1217±5.57 | 2.10±0.10 |

The data denote mean ± standard error of the mean.

Table S2:Alpha diversity index statistics.

| Sample ID | ACE | Chao1 | Simpson | Shannon | Pielou_e |
| --- | --- | --- | --- | --- | --- |
| A1 | 197533.6415 | 203067.3674 | 0.9999 | 16.5384 | 0.8516 |
| A2 | 172722.5979 | 167716.3205 | 0.9999 | 16.1156 | 0.8312 |
| A3 | 185741.0838 | 184274.9064 | 0.9999 | 16.3775 | 0.8421 |
| B1 | 219323.0043 | 223465.9897 | 0.9999 | 17.013 | 0.8687 |
| B2 | 223838.3139 | 227937.2899 | 0.9999 | 17.0385 | 0.8695 |
| B3 | 218884.9063 | 221354.5108 | 0.9999 | 17.0104 | 0.8674 |

Sample ID is the sample name; Chao1, Ace, Shannon, Simpson, and Pielou_e represents each index respectively.
